# Supplementary material
Source: MDPI journal article supplement (https://www.mdpi.com/2227-7390/10/14/2463)
Supplement: s1 [file s1 › mathematics-1762586-supplementary.pdf]

## QUESTIONNAIRE

### Instructions on how to complete the multiple-choice questionnaire

Enter here the name and contact details of the person responsible for administering the questionnaire and provide the telephone number and/or address in case of doubt. \_\_\_\_\_

1. This is a voluntary and unpaid questionnaire which is expected to be useful to the nursing community.

2. This survey is focused on clinical nurses and nurses' assistants only. Nurses involved in management, executive functions, governmental or public health activities, research and teaching should not complete the questionnaire.

3. If you have not had previous experience in telenursing, try to give your opinion in the case of joining a team with such a system, based on your previous experience in telephone patient care and use of digital media (smartphones, email, social networks, music consumption in the cloud, etc.) and your prospective behavioural intention.

4. The results are completely anonymous. There are no good or bad answers. Please answer all questions. Any answer is valid and appropriate. Please tick the answer that most closely matches your opinion. Only one answer per numbered item, please.

5. If you provide the answers in paper format, please mark a single circle with an X to indicate the answer that you think best represents your opinion for each question. Please remember, only one answer out of the five possibilities.

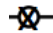

6. If you make a mistake, mark the wrong answer with a square and mark the correct answer as indicated

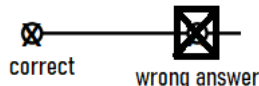

7. If you answer online, the system will allow you to change the answer. There is no need to answer all the questions at a time. Please take a few days if needed to answer, but please try to answer all questions. Submit the format when ready.

8. Remember that the system will not request or store any personal information; if you log in again from a different computer or smartphone your previous information will be lost.

9. The study follows the Principles of the Declaration of Helsinki (World Medical Association 2013). Data is recorded anonymously without any ID reference. No information reported in this paper can be linked to any individual. The study follows the procedure established by the Ethics Committee of the University of Valencia for these surveys.

10. Thank you very much for your collaboration!

**General demographic data (anonymous).**

Please do not include any information that could identify yourself.

A. Birth year (xxxx) (year only)

|  |  |  |  |
|--|--|--|--|
|  |  |  |  |
|--|--|--|--|

B. Gender

Male.....

Female.....

Other.....

|  |
|--|
|  |
|  |
|  |

C. Number of years working as a nurse (xx). If you have been working as an auxiliary nurse before, please indicate the full time in the profession.....

|  |  |
|--|--|
|  |  |
|--|--|

D. Country. Please mark X.

Spain.....

Portugal.....

Other (indicate).....

|  |
|--|
|  |
|  |
|  |

E. Workplace (If unemployed, please indicate the area in which you have been employed the longest). Please Mark X

Primary and community care nurse.....

Hospital Nurse.....

Nursing home nurse.....

|  |
|--|
|  |
|  |
|  |

F. (Highest) academic degree. If you have several degrees, please mark only the highest one with an X.

Nursing assistant certificate.....

Nursing school diploma (3 years).....

Bachelor's degree in nursing (4 years).....

Master's degree in nursing or health sciences....

Doctorate in nursing or health sciences.....

|  |
|--|
|  |
|  |
|  |
|  |
|  |

G. Experience using telenursing (total or partial).

I have never used telenursing .....

Two years or less.....

Over two years .....

|  |
|--|
|  |
|  |
|  |

## Questionnaire

1. In general, I consider telenursing to be.....
- useful

useless
2. I think I will be willing to use a telenursing system.
3. I will limit the use of telenursing to only the most basic nursing tasks.
4. I have no problem if the organisation requires me to use telenursing.
5. To the extent possible, I will use telenursing to do different things, clinical or non-clinical.
6. Adequate nursing patient care and management cannot be properly provided through the use of telenursing.
7. In general, I consider telenursing .....
- acceptable

unacceptable
8. I will not use telenursing except if it is mandatory in my work.
9. For nursing work telenursing systems are.....
- inappropriate

appropriate
10. It is difficult to manage the health and needs of patients through the use of telenursing.
11. I do not see the importance of telenursing in nursing care.

12. The use of telenursing in patient care is satisfactory.
- Strongly disagree      Disagree      Neutral      Agree      Strongly Agree
13. Telenursing will represent a delay in my patient care capacity.
- Strongly disagree      Disagree      Neutral      Agree      Strongly Agree
14. I will try to delay the use of telenursing for as long as possible.
- Strongly disagree      Disagree      Neutral      Agree      Strongly Agree
15. I consider telenursing systems to be important in nursing care.
- Strongly disagree      Disagree      Neutral      Agree      Strongly Agree
16. Telenursing is unacceptable for provision of nursing care.
- Strongly disagree      Disagree      Neutral      Agree      Strongly Agree
17. Telenursing is an appropriate way to manage health improvement and patients' needs.
- Strongly disagree      Disagree      Neutral      Agree      Strongly Agree
18. I intend to use telenursing technology in patient care and management as soon as it is available in my nursing unit.
- Strongly disagree      Disagree      Neutral      Agree      Strongly Agree
19. I will find telenursing systems irritating.
- Strongly disagree      Disagree      Neutral      Agree      Strongly Agree
20. The use of telenursing technology is appropriate for the delivery and management of nursing care.
- Strongly disagree      Disagree      Neutral      Agree      Strongly Agree
21. Telenursing will enable me to increase the efficiency of my service in patient care.
- Strongly disagree      Disagree      Neutral      Agree      Strongly Agree
